# Supplementary material for: Lanthanide coordination polymers constructed from 5-(1H-tetrazol-5-yl)isophthalic acid ligand: white light emission and color tuning
Source: Royal Society of Chemistry journal article supplement (doi:10.1039/c5ce00823a), 2015-01-01
Supplement: c5ce00823a1.pdf [file c5ce00823a1.pdf]

## **Lanthanide coordination polymers constructed from 5-(1H-tetrazol-5-yl)isophthalic acid ligand: white light emission and color tuning**

Jia Jia<sup>a,b</sup>, Jianing Xu<sup>a</sup>, Shengyan Wang<sup>a</sup>, Pengcheng Wang<sup>a</sup>, Lijuan Gao<sup>a</sup>, Miao Yu<sup>a</sup>, Yong Fan<sup>\*a</sup>  
and Li Wang<sup>\*a</sup>

<sup>a</sup> State Key Laboratory of Inorganic Synthesis & Preparative Chemistry, College of Chemistry, Jilin University, Changchun 130012, Jilin, P. R. China.

E-mail: lhl222@jlu.edu.cn; Fax: +86-431-85168439; Tel: +86-431-85168439

<sup>b</sup> College of Chemistry, Baicheng Normal University, Baicheng 137000, Jilin, P. R. China.

E-mail: jj\_zhx@126.com

# Supporting Information

## Table of Contents

1. The coordination geometry of Nd(III), binuclear SBU of **1**, 2D and 3D structure (Fig. S1)
2. IR spectra of compounds **1-5** (Fig. S2)
3. PXRD patterns for compounds **1-12** (Fig. S3)
4. TGA curves of the compounds **1-5** measured in nitrogen atmosphere (Fig. S4)
5. PXRD patterns for compound **5** and compound **5** boiling in water for 24 h (Fig. S5)
6. PXRD patterns for compound **4** and compounds **2-4** activated at 120 °C (Fig. S6)
7. TGA curves of the compounds **2-4** upon dehydration measured in air atmosphere (Fig. S7)
8. Excitation spectra of (a) Eu-**2**, (b) Gd-**3**, (c) Tb-**4** and (d) Sm-**5** (Fig. S8)
9. Luminescence decay profiles for compounds **2-5** and H<sub>3</sub>TZI ligand (Fig. S9)
10. Solid-state emission spectra and the CIE chromaticity diagram of compound Eu<sub>0.15</sub>Gd<sub>0.70</sub>Tb<sub>0.15 (**7**) with excitation wavelengths varying from 320 to 394 nm (Fig. S10)</sub>
11. Luminescence decay profiles for compounds **6-12** (Fig. S11)
12. Crystal data and structure refinement for compounds **1-5** (Table S1)
13. Selected bond lengths [Å] and angles [°] for compounds **1-5** (Table S2)
14. Hydrogen bond lengths and bond angles for compound **1** (Table S3)
15. CIE chromaticity coordinates (x, y) for compound Eu<sub>0.10</sub>Gd<sub>0.90</sub> (**6**) (Table S4)
16. CIE chromaticity coordinates (x, y) for compounds Eu<sub>x</sub>Gd<sub>y</sub>Tb<sub>1-x-y</sub> (**8-12**) (Table S5)
17. CIE chromaticity coordinates (x, y) for compound Eu<sub>0.15</sub>Gd<sub>0.70</sub>Tb<sub>0.15</sub> (**7**) (Table S6)
18. Luminescence lifetimes of the codoped compounds **6-12** (Table S7)

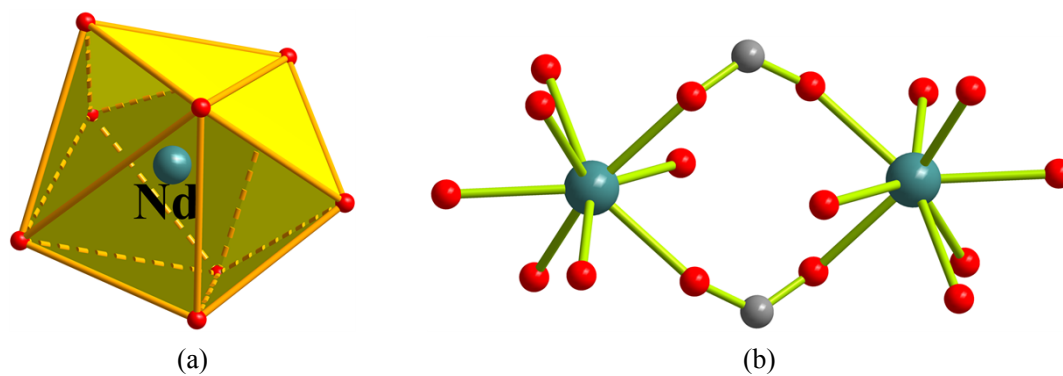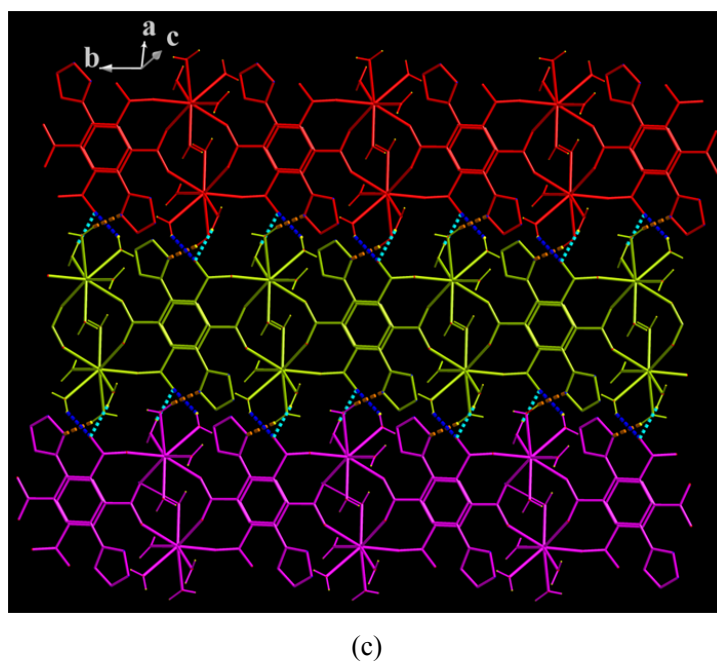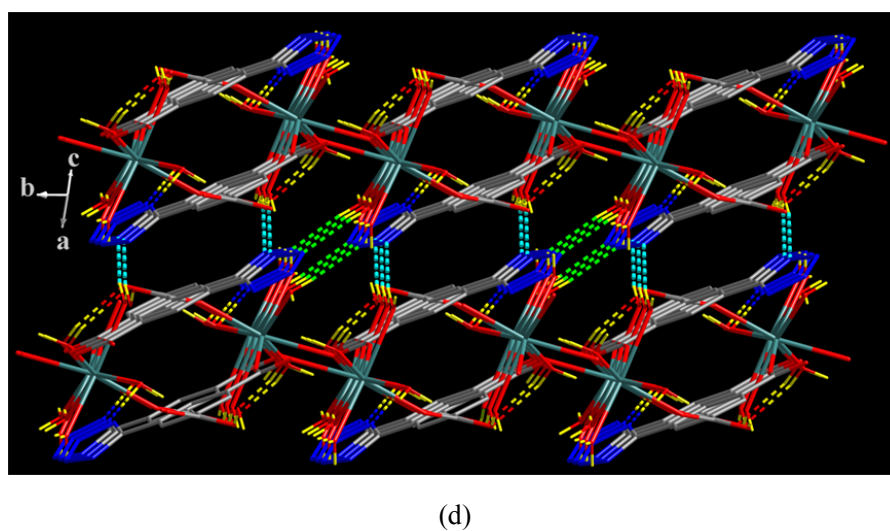

**Fig. S1** (a) The coordination geometry of Nd(III) in **1**; (b) binuclear SBU of **1**; (c) The 2D structure formed by hydrogen bonds(only hydrogen atoms of coordinated water molecules and hydrogen bonds are retained); (d)3D supramolecular structure constructed by the hydrogen bonds.

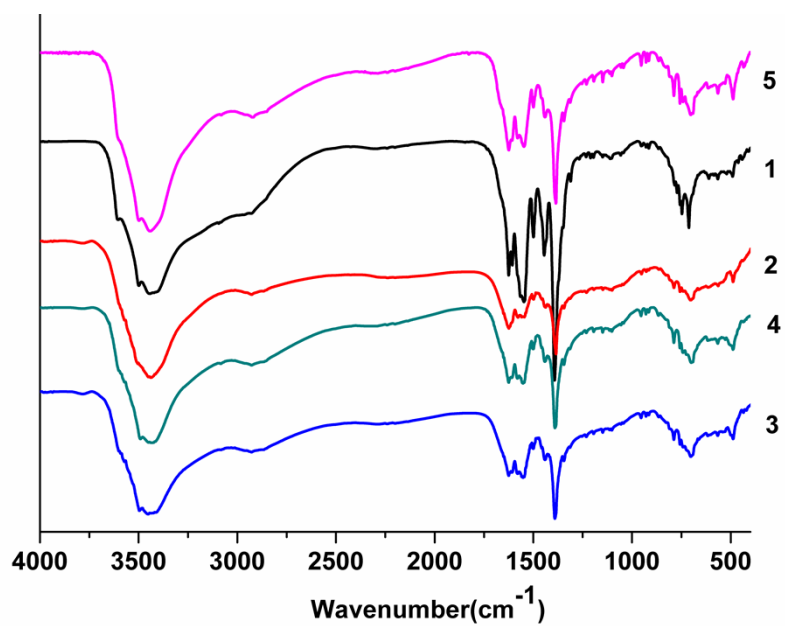

Fig. S2 IR spectra of compounds 1-5

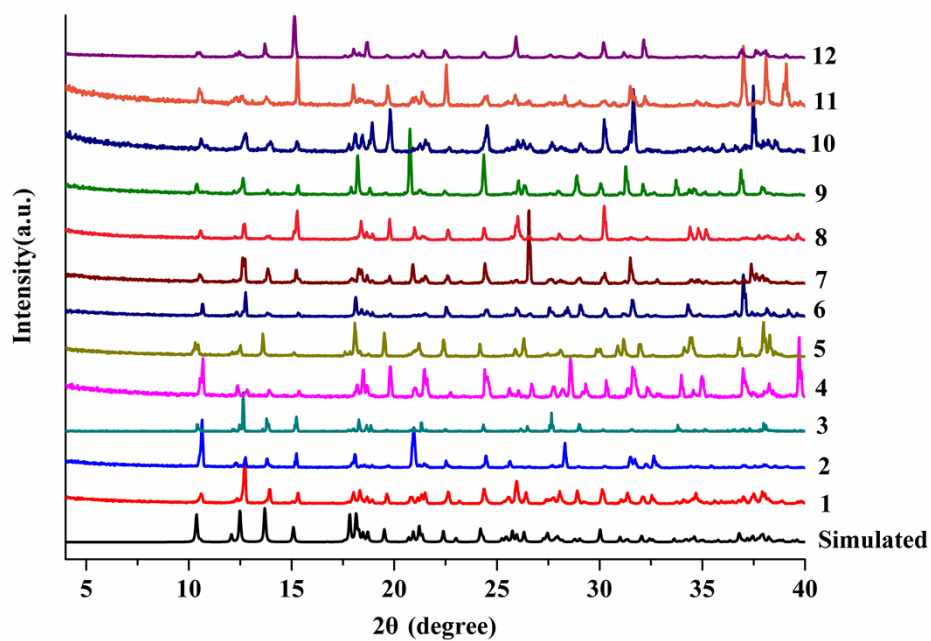

Fig. S3 PXRD patterns for compounds 1-12

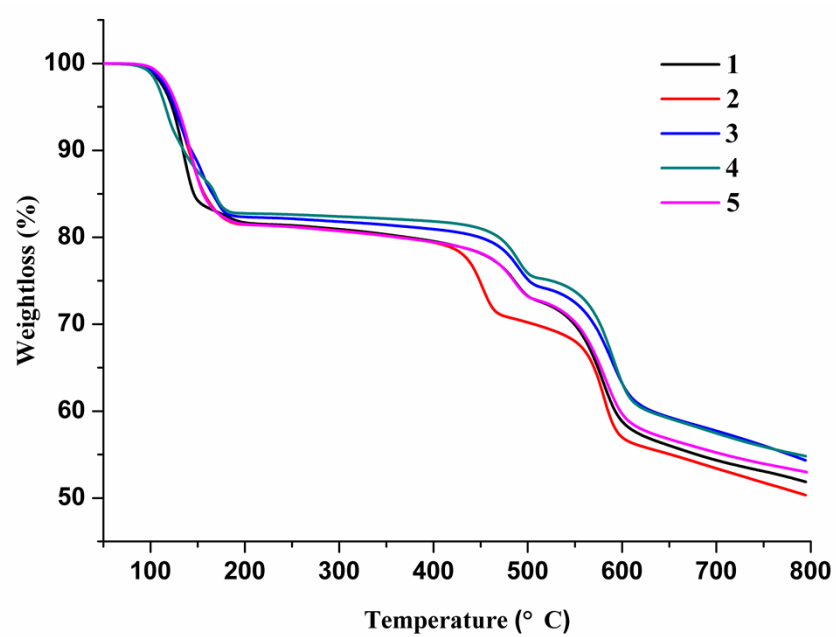

Fig. S4 TGA curves of the compounds 1-5 measured in nitrogen atmosphere.

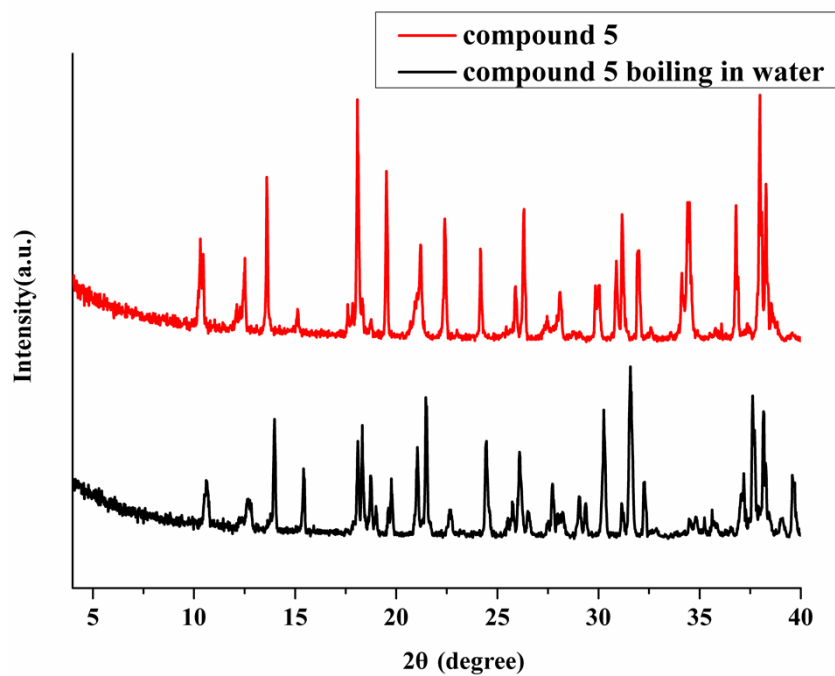

Fig. S5 PXRD patterns for compound 5 and compound 5 boiling in water for 24 h.

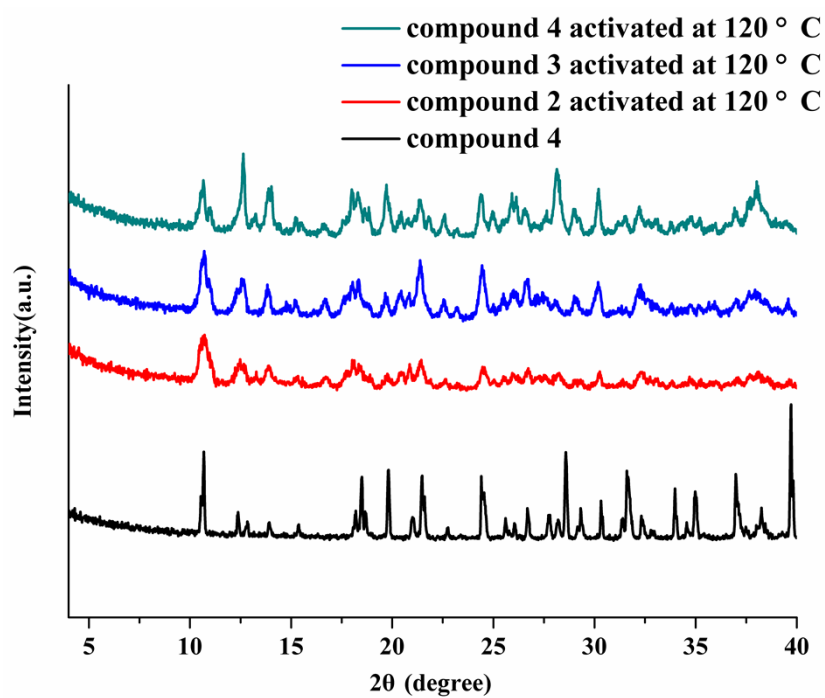

Fig. S6 PXR D patterns for compound 4 and compounds 2-4 activated at 120 °C.

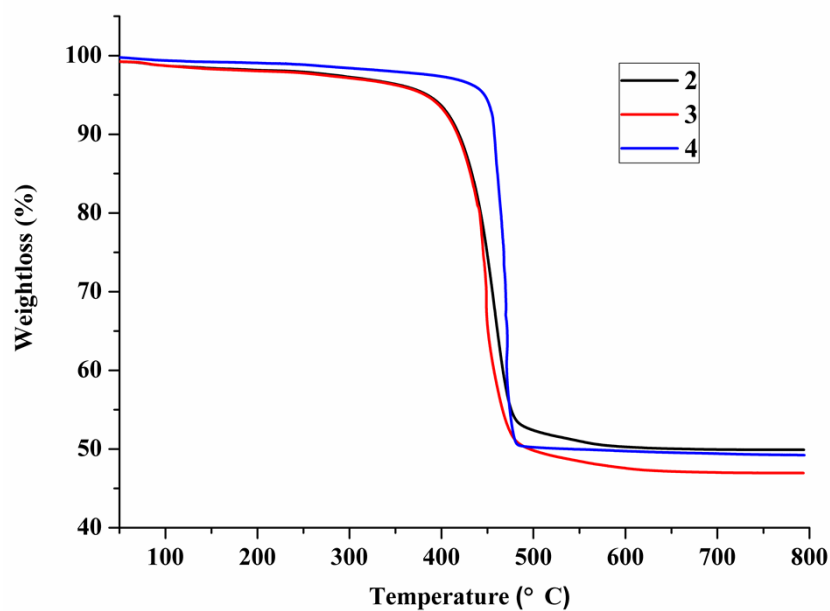

Fig. S7 TGA curves of the compounds 2-4 upon dehydration measured in air atmosphere.

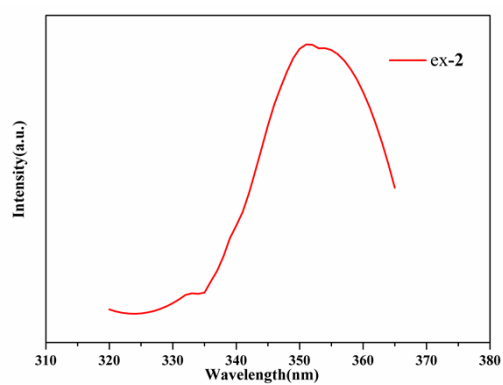

(a)

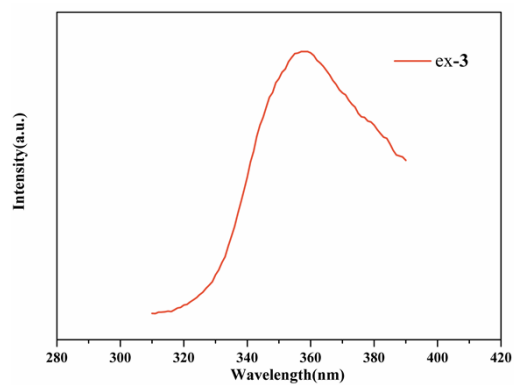

(b)

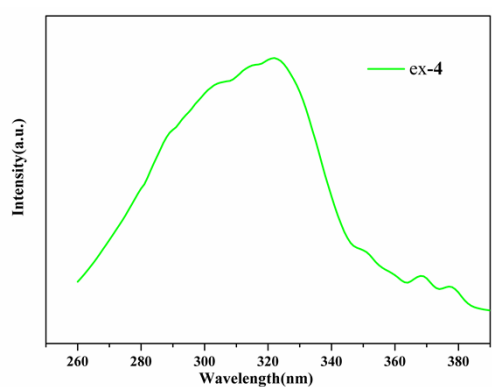

(c)

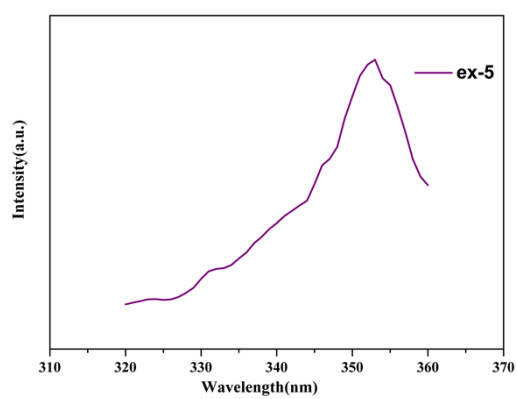

(d)

**Fig. S8** Solid-state excitation spectra of (a) Eu-2, (b) Gd-3, (c) Tb-4 and (d) Sm-5 at room temperature.

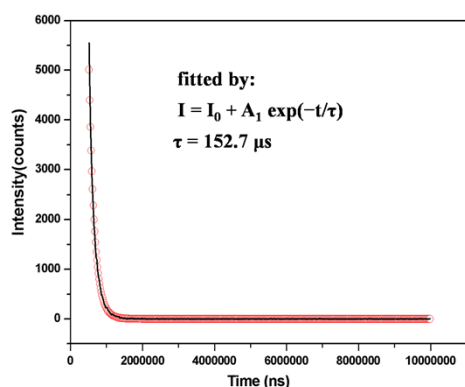

(a)

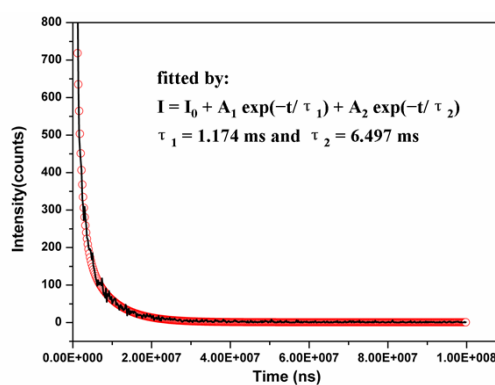

(b)

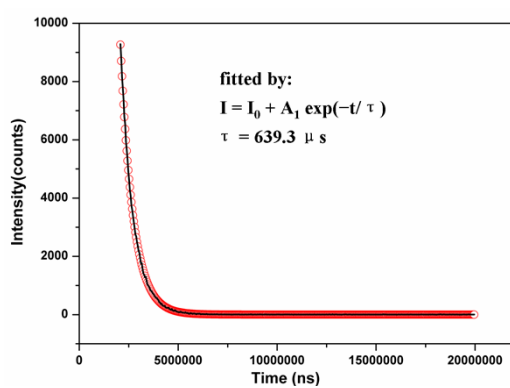

(c)

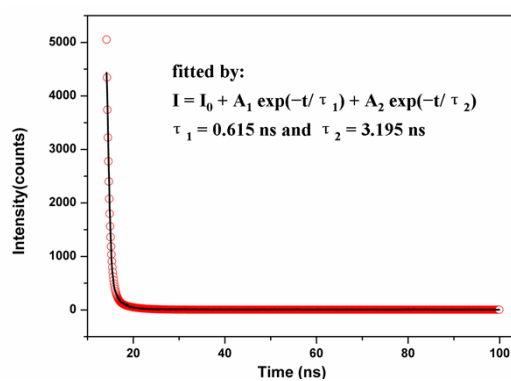

(d)

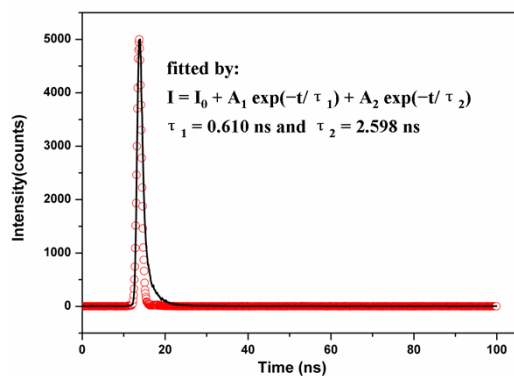

(e)

**Fig. S9** Luminescence decay profiles for compounds **2**-(a), **3**-(b), **4**-(c), **5**-(d) and H<sub>3</sub>TZI ligand-(e) recorded at room temperature. The <sup>5</sup>D<sub>0</sub> decay curve of compound **2** with emission was monitored at 614 nm ( $\lambda_{\text{ex}} = 352 \text{ nm}$ ). The red line is the best fitting to the data using a mono-exponential function, giving the value of  $\tau = 152.7 \mu\text{s}$ . The decay curve of compound **3** with emission was monitored at 495 nm ( $\lambda_{\text{ex}} = 358 \text{ nm}$ ). The <sup>5</sup>D<sub>4</sub> decay curve of compound **4** with emission was monitored at 543 nm ( $\lambda_{\text{ex}} = 322 \text{ nm}$ ). The red line is the best fitting to the data using a mono-exponential function, giving the value of  $\tau = 639.3 \mu\text{s}$ . The decay curve of compound **5** with emission was monitored at 512 nm ( $\lambda_{\text{ex}} = 353 \text{ nm}$ ).



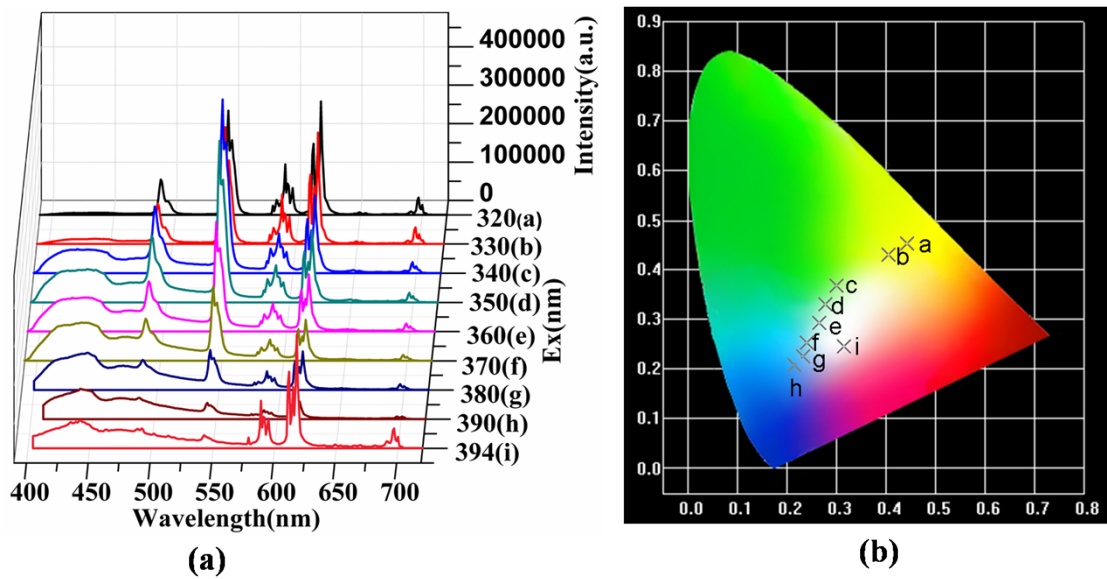

**Fig.S10** (a) Solid-state emission spectra of compound  $\text{Eu}_{0.15}\text{Gd}_{0.70}\text{Tb}_{0.15}$  with excitation wavelengths varying from 320 to 394 nm. (b) The CIE chromaticity diagram for the compound  $\text{Eu}_{0.15}\text{Gd}_{0.70}\text{Tb}_{0.15}$  under excitation wavelengths from 320 to 394 nm (a→i).

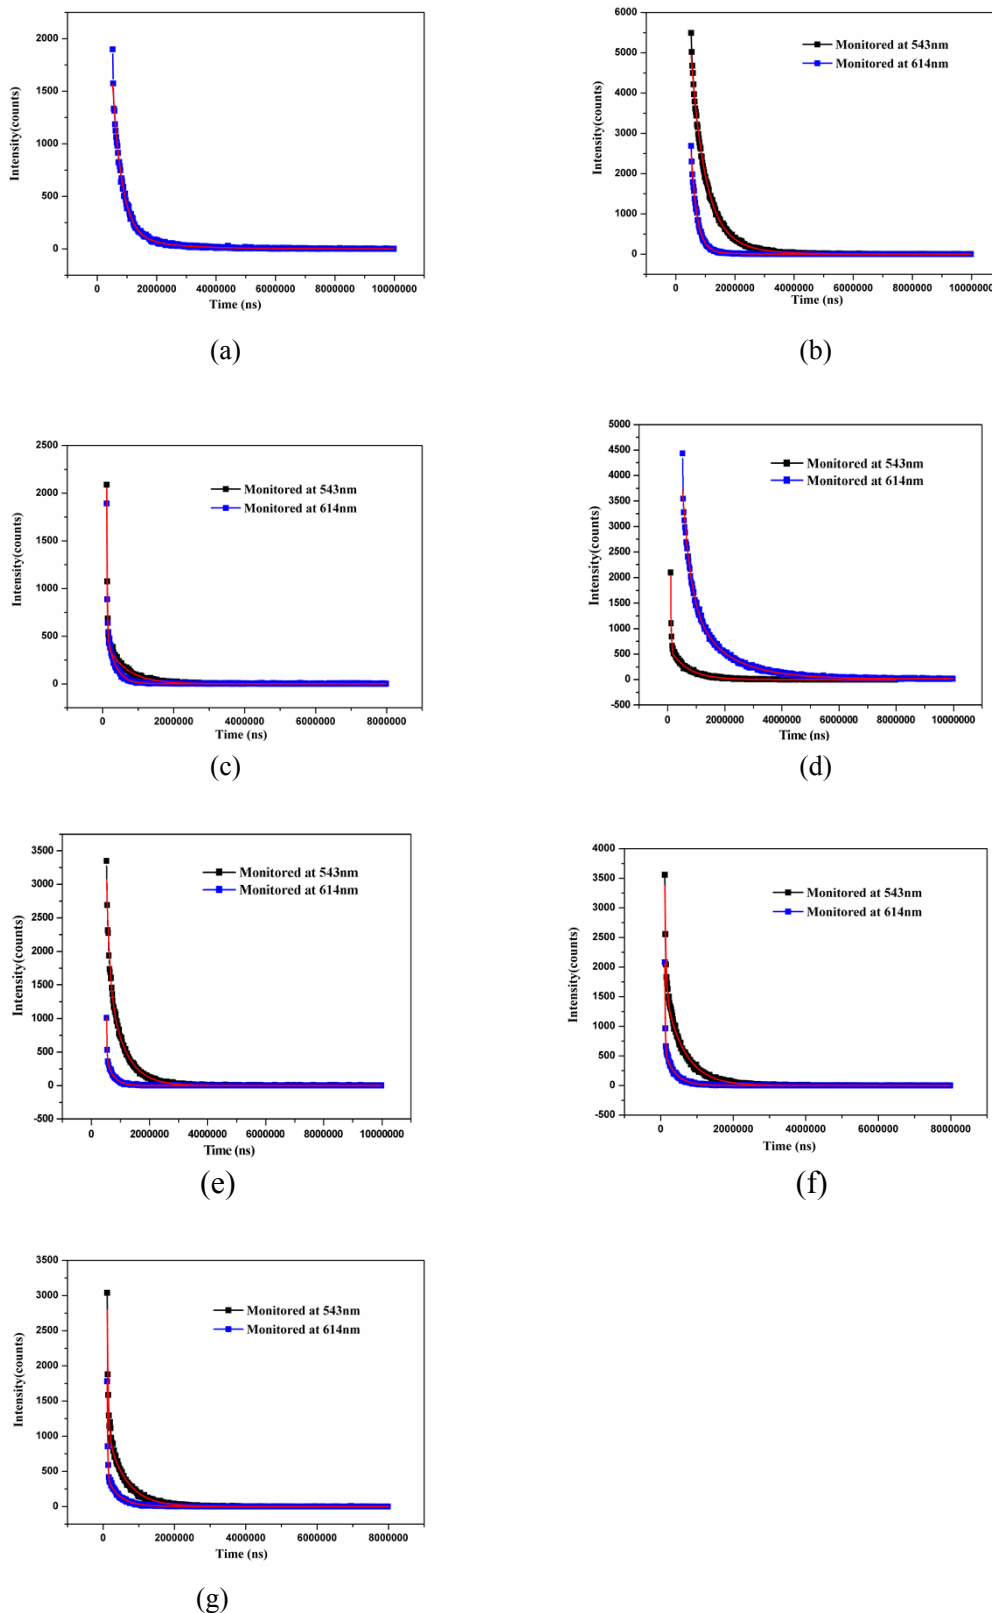

**Fig. S11** Luminescence decay profiles for compounds **6-12** recorded at room temperature. **6**-(a), **7**-(b), **8**-(c), **9**-(d), **10**-(e), **11**-(f) and **12**-(g). The  $^5D_0$  decay curve of compound **6** with emission was monitored at 614 nm ( $\lambda_{\text{ex}} = 352$  nm). The decay curves of compounds **7-12** were recorded with emission monitored by the  $^5D_4 \rightarrow ^7F_5$  transition at 543 nm and the  $^5D_0 \rightarrow ^7F_2$  transition at 614 nm ( $\lambda_{\text{ex}} = 365$  nm).

**Table S1.** Crystal data and structure refinement for compounds **1- 5**

| Compounds                                                | <b>1</b>                                                        | <b>2</b>                                                                       | <b>3</b>                                                         | <b>4</b>                                                                       | <b>5</b>                                                        |
|----------------------------------------------------------|-----------------------------------------------------------------|--------------------------------------------------------------------------------|------------------------------------------------------------------|--------------------------------------------------------------------------------|-----------------------------------------------------------------|
| Formula                                                  | C <sub>9</sub> H <sub>13</sub> NdN <sub>4</sub> O <sub>9</sub>  | C <sub>18</sub> H <sub>26</sub> Eu <sub>2</sub> N <sub>8</sub> O <sub>18</sub> | C <sub>9</sub> H <sub>13</sub> GdN <sub>4</sub> O <sub>9</sub>   | C <sub>18</sub> H <sub>26</sub> N <sub>8</sub> O <sub>18</sub> Tb <sub>2</sub> | C <sub>9</sub> H <sub>13</sub> N <sub>4</sub> O <sub>9</sub> Sm |
| Fw (g mol <sup>-1</sup> )                                | 465.47                                                          | 946.39                                                                         | 478.48                                                           | 960.33                                                                         | 471.59                                                          |
| Crystal system                                           | Triclinic                                                       | Triclinic                                                                      | Triclinic                                                        | Triclinic                                                                      | Triclinic                                                       |
| space group                                              | <i>P</i> -1                                                     | <i>P</i> -1                                                                    | <i>P</i> -1                                                      | <i>P</i> -1                                                                    | <i>P</i> -1                                                     |
| <i>a</i> (Å)                                             | 7.9987(6)                                                       | 7.9812(3)                                                                      | 7.9767(5)                                                        | 7.9698(4)                                                                      | 7.9849(16)                                                      |
| <i>b</i> (Å)                                             | 9.8130(6)                                                       | 9.7491(4)                                                                      | 9.7325(5)                                                        | 9.7137(5)                                                                      | 9.783(2)                                                        |
| <i>c</i> (Å)                                             | 10.4856(6)                                                      | 10.4153(4)                                                                     | 10.3966(6)                                                       | 10.3770(5)                                                                     | 10.443(2)                                                       |
| $\alpha$ (°)                                             | 116.667(4)                                                      | 116.8030(10)                                                                   | 116.8210(10)                                                     | 116.8630(10)                                                                   | 116.75(3)                                                       |
| $\beta$ (°)                                              | 107.471(4)                                                      | 107.3700(10)                                                                   | 107.3330(10)                                                     | 107.2860(10)                                                                   | 107.36(3)                                                       |
| $\gamma$ (°)                                             | 95.656(4)                                                       | 95.6700(10)                                                                    | 95.6690(10)                                                      | 95.6960(10)                                                                    | 95.71(3)                                                        |
| <i>V</i> (Å <sup>3</sup> )                               | 674.77(8)                                                       | 663.93(4)                                                                      | 661.32(7)                                                        | 658.07(6)                                                                      | 668.6(2)                                                        |
| <i>Z</i>                                                 | 2                                                               | 1                                                                              | 2                                                                | 1                                                                              | 2                                                               |
| <i>D</i> <sub>calc</sub> (g·cm <sup>-3</sup> )           | 2.291                                                           | 2.367                                                                          | 2.403                                                            | 2.423                                                                          | 2.342                                                           |
| $\mu$ (mm <sup>-1</sup> )                                | 3.907                                                           | 4.784                                                                          | 5.075                                                            | 5.435                                                                          | 4.452                                                           |
| <i>F</i> (000)                                           | 454                                                             | 460                                                                            | 462                                                              | 464                                                                            | 458                                                             |
| $\theta$ range (°)                                       | 2.36 - 25.14                                                    | 2.38 - 28.36                                                                   | 2.39 - 28.28                                                     | 2.38 - 28.31                                                                   | 2.37 - 25.02                                                    |
| Limiting indices                                         | -9 ≤ <i>h</i> ≤ 9<br>-10 ≤ <i>k</i> ≤ 11<br>-12 ≤ <i>l</i> ≤ 12 | -10 ≤ <i>h</i> ≤ 10<br>-13 ≤ <i>k</i> ≤ 13<br>-13 ≤ <i>l</i> ≤ 13              | -9 ≤ <i>h</i> ≤ 10<br>-12 ≤ <i>k</i> ≤ 10<br>-13 ≤ <i>l</i> ≤ 13 | -7 ≤ <i>h</i> ≤ 10<br>-12 ≤ <i>k</i> ≤ 9<br>-13 ≤ <i>l</i> ≤ 13                | -8 ≤ <i>h</i> ≤ 9<br>-11 ≤ <i>k</i> ≤ 11<br>-12 ≤ <i>l</i> ≤ 12 |
| Refl. Collected /<br>unique                              | 3855 / 2403                                                     | 4947 / 3288                                                                    | 4839 / 3229                                                      | 4848 / 3238                                                                    | 3788 / 2361                                                     |
| <i>R</i> <sub>int</sub>                                  | 0.0480                                                          | 0.0316                                                                         | 0.0329                                                           | 0.0330                                                                         | 0.0212                                                          |
| Data / restraints<br>/ parameters                        | 2403 / 7 / 247                                                  | 3288 / 0 / 260                                                                 | 3229 / 0 / 248                                                   | 3238 / 0 / 260                                                                 | 2361 / 0 / 248                                                  |
| GOF                                                      | 1.093                                                           | 1.013                                                                          | 0.922                                                            | 1.039                                                                          | 1.572                                                           |
| <i>R</i> <sub><i>I</i></sub> [ <i>I</i> >2σ( <i>I</i> )] | 0.0273                                                          | 0.0210                                                                         | 0.0284                                                           | 0.0259                                                                         | 0.0341                                                          |
| <i>wR</i> <sub>2</sub> [ <i>I</i> >2σ( <i>I</i> )]       | 0.0701                                                          | 0.0514                                                                         | 0.0764                                                           | 0.0664                                                                         | 0.0768                                                          |
| <i>R</i> <sub><i>I</i></sub> (all data)                  | 0.0282                                                          | 0.0225                                                                         | 0.0293                                                           | 0.0275                                                                         | 0.0365                                                          |
| <i>wR</i> <sub>2</sub> (all data)                        | 0.0707                                                          | 0.0519                                                                         | 0.0773                                                           | 0.0674                                                                         | 0.0774                                                          |
| Largest diff.<br>peak and hole<br>(e·Å <sup>-3</sup> )   | 1.671 and -1.481                                                | 1.385 and -1.310                                                               | 1.428 and -1.408                                                 | 0.744 and -0.613                                                               | 0.780 and -1.354                                                |
| CCDC No.                                                 | 1028649                                                         | 1029007                                                                        | 1033880                                                          | 1028648                                                                        | 1029044                                                         |

**Table S2.** Selected bond lengths [Å] and angles [°] for compounds **1- 5**

| 1                   |            |                   |            |
|---------------------|------------|-------------------|------------|
| Nd(1)-O(1)          | 2.360(3)   | Nd(1)-O(9)        | 2.482(3)   |
| Nd(1)-O(3)#1        | 2.391(3)   | Nd(1)-O(6)        | 2.494(3)   |
| Nd(1)-O(2)#2        | 2.456(3)   | Nd(1)-O(5)        | 2.527(3)   |
| Nd(1)-O(8)          | 2.463(3)   | Nd(1)-O(7)        | 2.529(3)   |
| O(1)-Nd(1)-O(3)#1   | 83.59(10)  | O(9)-Nd(1)-O(6)   | 136.28(10) |
| O(1)-Nd(1)-O(2)#2   | 84.75(10)  | O(1)-Nd(1)-O(5)   | 68.84(10)  |
| O(3)#1-Nd(1)-O(2)#2 | 155.89(10) | O(3)#1-Nd(1)-O(5) | 97.60(10)  |
| O(1)-Nd(1)-O(8)     | 142.41(10) | O(2)#2-Nd(1)-O(5) | 97.75(10)  |
| O(3)#1-Nd(1)-O(8)   | 94.24(10)  | O(8)-Nd(1)-O(5)   | 147.92(10) |
| O(2)#2-Nd(1)-O(8)   | 82.36(10)  | O(9)-Nd(1)-O(5)   | 139.99(10) |
| O(1)-Nd(1)-O(9)     | 71.30(10)  | O(6)-Nd(1)-O(5)   | 77.87(10)  |
| O(3)#1-Nd(1)-O(9)   | 81.13(10)  | O(1)-Nd(1)-O(7)   | 127.75(11) |
| O(2)#2-Nd(1)-O(9)   | 75.15(10)  | O(3)#1-Nd(1)-O(7) | 135.23(10) |
| O(8)-Nd(1)-O(9)     | 71.29(10)  | O(2)#2-Nd(1)-O(7) | 67.69(10)  |
| O(1)-Nd(1)-O(6)     | 134.35(10) | O(8)-Nd(1)-O(7)   | 78.62(11)  |
| O(3)#1-Nd(1)-O(6)   | 70.52(10)  | O(9)-Nd(1)-O(7)   | 134.60(10) |
| O(2)#2-Nd(1)-O(6)   | 131.14(10) | O(6)-Nd(1)-O(7)   | 64.74(10)  |
| O(8)-Nd(1)-O(6)     | 78.20(10)  | O(5)-Nd(1)-O(7)   | 71.98(11)  |
| 2                   |            |                   |            |
| Eu(1)-O(3)#1        | 2.3230(19) | Eu(1)-O(2)        | 2.434(2)   |
| Eu(1)-O(5)#2        | 2.346(2)   | Eu(1)-O(6)        | 2.439(2)   |
| Eu(1)-O(7)          | 2.409(2)   | Eu(1)-O(4)        | 2.477(2)   |
| Eu(1)-O(1)          | 2.416(2)   | Eu(1)-O(8)        | 2.484(2)   |
| O(3)#1-Eu(1)-O(5)#2 | 83.18(7)   | O(2)-Eu(1)-O(6)   | 136.36(8)  |
| O(3)#1-Eu(1)-O(7)   | 142.65(8)  | O(3)#1-Eu(1)-O(4) | 68.79(8)   |
| O(5)#2-Eu(1)-O(7)   | 94.78(8)   | O(5)#2-Eu(1)-O(4) | 96.62(8)   |
| O(3)#1-Eu(1)-O(1)   | 84.53(7)   | O(7)-Eu(1)-O(4)   | 147.83(8)  |
| O(5)#2-Eu(1)-O(1)   | 156.06(7)  | O(1)-Eu(1)-O(4)   | 97.95(8)   |
| O(7)-Eu(1)-O(1)     | 82.76(8)   | O(2)-Eu(1)-O(4)   | 140.33(8)  |
| O(3)#1-Eu(1)-O(2)   | 71.63(8)   | O(6)-Eu(1)-O(4)   | 77.12(8)   |
| O(5)#2-Eu(1)-O(2)   | 81.10(8)   | O(3)#1-Eu(1)-O(8) | 127.60(8)  |
| O(7)-Eu(1)-O(2)     | 71.23(9)   | O(5)#2-Eu(1)-O(8) | 135.82(8)  |
| O(1)-Eu(1)-O(2)     | 75.56(7)   | O(7)-Eu(1)-O(8)   | 78.33(9)   |
| O(3)#1-Eu(1)-O(6)   | 133.98(8)  | O(1)-Eu(1)-O(8)   | 67.17(8)   |
| O(5)#2-Eu(1)-O(6)   | 70.78(8)   | O(2)-Eu(1)-O(8)   | 134.16(8)  |
| O(7)-Eu(1)-O(6)     | 78.46(8)   | O(6)-Eu(1)-O(8)   | 65.06(9)   |
| O(1)-Eu(1)-O(6)     | 131.17(7)  | O(4)-Eu(1)-O(8)   | 72.54(8)   |
| 3                   |            |                   |            |
| Gd(1)-O(2)          | 2.319(2)   | Gd(1)-O(1)        | 2.419(3)   |
| Gd(1)-O(4)          | 2.339(2)   | Gd(1)-O(5)        | 2.435(3)   |
| Gd(1)-O(7)          | 2.396(3)   | Gd(1)-O(3)        | 2.457(3)   |
| Gd(1)-O(8)          | 2.406(2)   | Gd(1)-O(6)        | 2.469(3)   |

|                 |            |                 |            |
|-----------------|------------|-----------------|------------|
| O(2)-Gd(1)-O(4) | 83.10(9)   | O(2)-Gd(1)-O(1) | 71.82(9)   |
| O(2)-Gd(1)-O(7) | 142.86(10) | O(4)-Gd(1)-O(1) | 80.95(9)   |
| O(4)-Gd(1)-O(7) | 94.50(10)  | O(7)-Gd(1)-O(1) | 71.21(10)  |
| O(2)-Gd(1)-O(8) | 84.60(9)   | O(8)-Gd(1)-O(1) | 75.45(9)   |
| O(4)-Gd(1)-O(8) | 155.82(10) | O(2)-Gd(1)-O(5) | 133.71(9)  |
| O(7)-Gd(1)-O(8) | 82.95(9)   | O(4)-Gd(1)-O(5) | 70.88(9)   |
| O(7)-Gd(1)-O(5) | 78.45(10)  | O(8)-Gd(1)-O(5) | 131.30(9)  |
| O(1)-Gd(1)-O(5) | 136.42(10) | O(2)-Gd(1)-O(3) | 68.75(10)  |
| O(4)-Gd(1)-O(3) | 96.59(9)   | O(7)-Gd(1)-O(3) | 147.77(11) |
| O(8)-Gd(1)-O(3) | 98.22(9)   | O(1)-Gd(1)-O(3) | 140.48(10) |
| O(5)-Gd(1)-O(3) | 76.82(10)  | O(2)-Gd(1)-O(6) | 127.71(10) |
| O(4)-Gd(1)-O(6) | 135.94(11) | O(7)-Gd(1)-O(6) | 78.24(11)  |
| O(8)-Gd(1)-O(6) | 67.24(10)  | O(1)-Gd(1)-O(6) | 134.00(10) |
| O(5)-Gd(1)-O(6) | 65.07(10)  | O(3)-Gd(1)-O(6) | 72.76(10)  |

4

|                     |            |                   |            |
|---------------------|------------|-------------------|------------|
| Tb(1)-O(1)          | 2.303(2)   | Tb(1)-O(6)        | 2.402(3)   |
| Tb(1)-O(4)#1        | 2.314(3)   | Tb(1)-O(8)        | 2.416(3)   |
| Tb(1)-O(5)          | 2.381(3)   | Tb(1)-O(7)        | 2.443(3)   |
| Tb(1)-O(2)#2        | 2.396(2)   | Tb(1)-O(9)        | 2.462(3)   |
| O(1)-Tb(1)-O(4)#1   | 83.11(9)   | O(1)-Tb(1)-O(5)   | 142.88(10) |
| O(4)#1-Tb(1)-O(5)   | 94.76(11)  | O(5)-Tb(1)-O(6)   | 71.05(11)  |
| O(1)-Tb(1)-O(2)#2   | 84.20(9)   | O(2)#2-Tb(1)-O(6) | 75.58(9)   |
| O(4)#1-Tb(1)-O(2)#2 | 156.00(9)  | O(1)-Tb(1)-O(8)   | 133.82(9)  |
| O(5)-Tb(1)-O(2)#2   | 83.30(10)  | O(4)#1-Tb(1)-O(8) | 70.84(10)  |
| O(1)-Tb(1)-O(6)     | 72.02(10)  | O(5)-Tb(1)-O(8)   | 78.40(11)  |
| O(4)#1-Tb(1)-O(6)   | 81.15(9)   | O(2)#2-Tb(1)-O(8) | 131.39(10) |
| O(6)-Tb(1)-O(8)     | 136.26(10) | O(1)-Tb(1)-O(9)   | 127.49(10) |
| O(1)-Tb(1)-O(7)     | 68.81(10)  | O(4)#1-Tb(1)-O(9) | 136.15(10) |
| O(4)#1-Tb(1)-O(7)   | 96.18(10)  | O(5)-Tb(1)-O(9)   | 78.18(11)  |
| O(5)-Tb(1)-O(7)     | 147.69(12) | O(2)#2-Tb(1)-O(9) | 67.00(10)  |
| O(2)#2-Tb(1)-O(7)   | 98.10(10)  | O(6)-Tb(1)-O(9)   | 133.66(11) |
| O(6)-Tb(1)-O(7)     | 140.76(10) | O(8)-Tb(1)-O(9)   | 65.33(11)  |
| O(8)-Tb(1)-O(7)     | 76.70(10)  | O(7)-Tb(1)-O(9)   | 72.89(10)  |

5

|                     |            |                   |            |
|---------------------|------------|-------------------|------------|
| Sm(1)-O(4)#1        | 2.339(4)   | Sm(1)-O(5)        | 2.442(5)   |
| Sm(1)-O(2)          | 2.360(4)   | Sm(1)-O(8)        | 2.457(5)   |
| Sm(1)-O(3)#2        | 2.430(4)   | Sm(1)-O(9)        | 2.487(5)   |
| Sm(1)-O(6)          | 2.431(4)   | Sm(1)-O(7)        | 2.500(5)   |
| O(4)#1-Sm(1)-O(2)   | 83.10(15)  | O(5)-Sm(1)-O(8)   | 136.03(18) |
| O(4)#1-Sm(1)-O(3)#2 | 84.52(14)  | O(4)#1-Sm(1)-O(9) | 68.87(16)  |
| O(2)-Sm(1)-O(3)#2   | 155.93(14) | O(2)-Sm(1)-O(9)   | 96.66(16)  |
| O(4)#1-Sm(1)-O(6)   | 142.53(16) | O(3)#2-Sm(1)-O(9) | 97.99(16)  |
| O(2)-Sm(1)-O(6)     | 94.68(16)  | O(6)-Sm(1)-O(9)   | 147.90(17) |
| O(3)#2-Sm(1)-O(6)   | 82.82(15)  | O(5)-Sm(1)-O(9)   | 140.35(19) |

|                   |            |                   |            |
|-------------------|------------|-------------------|------------|
| O(4)#1-Sm(1)-O(5) | 71.56(18)  | O(8)-Sm(1)-O(9)   | 77.49(16)  |
| O(2)-Sm(1)-O(5)   | 81.03(16)  | O(4)#1-Sm(1)-O(7) | 127.78(16) |
| O(3)#2-Sm(1)-O(5) | 75.50(16)  | O(2)-Sm(1)-O(7)   | 135.68(17) |
| O(6)-Sm(1)-O(5)   | 71.15(19)  | O(3)#2-Sm(1)-O(7) | 67.44(16)  |
| O(4)#1-Sm(1)-O(8) | 134.31(15) | O(6)-Sm(1)-O(7)   | 78.42(17)  |
| O(2)-Sm(1)-O(8)   | 70.81(16)  | O(5)-Sm(1)-O(7)   | 134.31(18) |
| O(3)#2-Sm(1)-O(8) | 131.19(15) | O(8)-Sm(1)-O(7)   | 64.90(18)  |
| O(6)-Sm(1)-O(8)   | 78.11(16)  | O(9)-Sm(1)-O(7)   | 72.49(17)  |

Symmetry transformations used to generate equivalent atoms for **1**: #1 -x,-y+1,-z+1; #2 -x,-y,-z+1, for **2**: #1 -x+1,-y,-z+1; #2 x,y-1,z; for **4**: #1 -x,-y+1,-z; #2 -x,-y,-z, for **5**: #1 -x,-y+1,-z; #2 x,y-1,z.

**Table S3.** Hydrogen bond lengths and bond angles for compound **1**.

| D-H $\cdots$ A      | $d(\text{D-H}) / \text{\AA}$ | $d(\text{H}\cdots\text{A}) / \text{\AA}$ | $d(\text{D}\cdots\text{A}) / \text{\AA}$ | $\angle\text{DHA} / ^\circ$ |
|---------------------|------------------------------|------------------------------------------|------------------------------------------|-----------------------------|
| O6-H7 $\cdots$ N4#2 | 0.92                         | 1.87                                     | 2.775(5)                                 | 167                         |
| O7-H1 $\cdots$ O4#1 | 0.84                         | 2.07                                     | 2.845(4)                                 | 152                         |
| O5-H5 $\cdots$ O4#1 | 0.86                         | 1.85                                     | 2.676(4)                                 | 160                         |
| O9-H3 $\cdots$ N2#4 | 0.79                         | 1.93                                     | 2.719(5)                                 | 174                         |
| O5-H6 $\cdots$ N1#5 | 0.90                         | 2.01                                     | 2.898(5)                                 | 170                         |

Symmetry transformations used to generate equivalent atoms: #1: x+1, y, z+1; #2: -x+1, -y+1, -z+2; #4: x-1, y-1, z; #5: -x+1, -y+1, -z+1.

**Table S4.** CIE chromaticity coordinates (x, y) for compound Eu<sub>0.10</sub> Gd<sub>0.90</sub> (**6**).

| $\lambda_{\text{ex}} / \text{nm}$ | Eu <sub>0.10</sub> Gd <sub>0.90</sub> |
|-----------------------------------|---------------------------------------|
| 330                               | (0.493, 0.297)                        |
| 340                               | (0.420, 0.293)                        |
| 350                               | (0.332, 0.294)                        |
| 360                               | (0.286, 0.284)                        |
| 370                               | (0.270, 0.266)                        |
| 380                               | (0.273, 0.263)                        |

**Table S5.** CIE chromaticity coordinates (x, y) for compounds Eu<sub>x</sub> Gd<sub>y</sub> Tb<sub>1-x-y</sub> (**8-12**).

| Compounds                                                              | Coordinates    |
|------------------------------------------------------------------------|----------------|
| Eu <sub>0.25</sub> Gd <sub>0.70</sub> Tb <sub>0.05</sub> ( <b>8</b> )  | (0.311, 0.269) |
| Eu <sub>0.20</sub> Gd <sub>0.70</sub> Tb <sub>0.10</sub> ( <b>9</b> )  | (0.339, 0.295) |
| Eu <sub>0.25</sub> Gd <sub>0.60</sub> Tb <sub>0.15</sub> ( <b>10</b> ) | (0.320, 0.310) |
| Eu <sub>0.20</sub> Gd <sub>0.55</sub> Tb <sub>0.25</sub> ( <b>11</b> ) | (0.297, 0.333) |
| Eu <sub>0.25</sub> Gd <sub>0.50</sub> Tb <sub>0.25</sub> ( <b>12</b> ) | (0.336, 0.325) |

**Table S6.** CIE chromaticity coordinates (x, y) for compound Eu<sub>0.15</sub> Gd<sub>0.70</sub> Tb<sub>0.15</sub> (**7**).

| $\lambda_{\text{ex}} / \text{nm}$ | Eu <sub>0.15</sub> Gd <sub>0.70</sub> Tb <sub>0.15</sub> |
|-----------------------------------|----------------------------------------------------------|
| 320                               | (0.443, 0.452)                                           |
| 330                               | (0.406, 0.430)                                           |
| 340                               | (0.299, 0.367)                                           |
| 350                               | (0.278, 0.330)                                           |
| 360                               | (0.264, 0.292)                                           |
| 370                               | (0.241, 0.252)                                           |
| 380                               | (0.232, 0.224)                                           |
| 390                               | (0.214, 0.208)                                           |
| 394                               | (0.314, 0.244)                                           |

**Table S7.** Luminescence lifetimes of the codoped compounds **6-12**.

| Compounds                                                                                          | luminescence lifetimes<br>( $\tau_{\text{Tb}^{3+}}$ ) | luminescence lifetimes<br>( $\tau_{\text{Eu}^{3+}}$ ) |
|----------------------------------------------------------------------------------------------------|-------------------------------------------------------|-------------------------------------------------------|
| $[\text{Eu}_{0.10}\text{Gd}_{0.90}(\text{TZl})(\text{H}_2\text{O})_5]_n$ <b>6</b>                  | 0                                                     | $\tau_1 = 0.318$ ms<br>$\tau_2 = 1.458$ ms            |
| $[\text{Eu}_{0.15}\text{Gd}_{0.70}\text{Tb}_{0.15}(\text{TZl})(\text{H}_2\text{O})_5]_n$ <b>7</b>  | $\tau_1 = 0.431$ ms<br>$\tau_2 = 0.938$ ms            | $\tau_1 = 0.198$ ms<br>$\tau_2 = 0.706$ ms            |
| $[\text{Eu}_{0.25}\text{Gd}_{0.70}\text{Tb}_{0.05}(\text{TZl})(\text{H}_2\text{O})_5]_n$ <b>8</b>  | $\tau_1 = 19.36$ us<br>$\tau_2 = 563.8$ us            | $\tau_1 = 13.70$ us<br>$\tau_2 = 236.2$ us            |
| $[\text{Eu}_{0.20}\text{Gd}_{0.70}\text{Tb}_{0.10}(\text{TZl})(\text{H}_2\text{O})_5]_n$ <b>9</b>  | $\tau_1 = 19.67$ us<br>$\tau_2 = 631.2$ us            | $\tau_1 = 287.1$ us<br>$\tau_2 = 1.322$ ms            |
| $[\text{Eu}_{0.25}\text{Gd}_{0.60}\text{Tb}_{0.15}(\text{TZl})(\text{H}_2\text{O})_5]_n$ <b>10</b> | $\tau_1 = 94.73$ us<br>$\tau_2 = 565.2$ us            | $\tau_1 = 16.82$ us<br>$\tau_2 = 256.1$ us            |
| $[\text{Eu}_{0.20}\text{Gd}_{0.55}\text{Tb}_{0.25}(\text{TZl})(\text{H}_2\text{O})_5]_n$ <b>11</b> | $\tau_1 = 34.84$ us<br>$\tau_2 = 533.0$ us            | $\tau_1 = 14.56$ us<br>$\tau_2 = 298.2$ us            |
| $[\text{Eu}_{0.25}\text{Gd}_{0.50}\text{Tb}_{0.25}(\text{TZl})(\text{H}_2\text{O})_5]_n$ <b>12</b> | $\tau_1 = 33.42$ us<br>$\tau_2 = 523.7$ us            | $\tau_1 = 16.38$ us<br>$\tau_2 = 354.5$ us            |
